1 Title: Effects of inactivation method on SARS-CoV-2 virion protein and structure

2

3 Authors: Emma K. Loveday<sup>1</sup>, Kyle S. Hain<sup>2</sup>, Irina Kochetkova<sup>2</sup>, Jodi F. Hedges<sup>2</sup>,

4 Amanda Robison<sup>2</sup>, Deann T. Snyder<sup>2</sup>, Susan K. Brumfield<sup>3</sup>, Mark J. Young<sup>3</sup>, Mark A.

5 Jutila<sup>2</sup>, Connie B. Chang<sup>1</sup>, and Matthew P. Taylor<sup>2</sup>

6 Affiliations:

7 <sup>1</sup> Dept. of Chemical & Biological Engineering, Montana State University

8 <sup>2</sup> Dept. of Microbiology & Immunology, Montana State University

9 <sup>3</sup> Dept. of Plant Science and Plant Pathology, Montana State University

10

11 Corresponding Author:

12 Matthew P. Taylor

13 [mptaylor@montana.edu](mailto:mptaylor@montana.edu)

14 406-994-7467

15

16

17 Working title: Inactivation and structure of SARS-CoV-2 virions

18

19 **Abstract:**

20 The risk posed by Severe Acute Respiratory Syndrome Coronavirus -2 (SARS-CoV-2)  
21 dictates that live-virus research is conducted in a biosafety level 3 (BSL3) facility.  
22 Working with SARS-CoV-2 at lower biosafety levels can expedite research yet requires  
23 the virus to be fully inactivated. In this study, we validated and compared two protocols  
24 for inactivating SARS-CoV-2: heat treatment and ultraviolet irradiation. The two  
25 methods were optimized to render the virus completely incapable of infection while  
26 limiting destructive effects of inactivation. We observed that 15 minutes of incubation at  
27 65°C completely inactivates high titer viral stocks. Complete inactivation was also  
28 achieved with minimal amounts of UV power (70,000  $\mu\text{J}/\text{cm}^2$ ), which is 100-fold less  
29 power than comparable studies. Once validated, the two methods were then compared  
30 for viral RNA quantification, virion purification, and antibody recognition. We observed  
31 that UV irradiation resulted in a 2-log reduction of detectable genomes compared to  
32 heat inactivation. Protein yield following virion enrichment was equivalent for all  
33 inactivation conditions, but the resulting viral proteins and virions were negatively  
34 impacted by inactivation method and time. We outline the strengths and weaknesses of  
35 each method so that investigators might choose the one which best meets their  
36 research goals.  
37

38 **Introduction:**

39           The emergence of the novel SARS-CoV-2 resulted in tremendous social and  
40 economic distress. Factors affecting the outcome of SARS-CoV-2 infection remain  
41 unclear, meriting considerable research investment. Research with infectious SARS-  
42 CoV-2 must be performed under biosafety level 3 (BSL3) conditions. While these  
43 conditions excel at keeping researchers and the community safe, they lack the  
44 expediency required for responding to a global pandemic. Researching SARS-CoV-2 at  
45 a more accessible, lower biosafety level requires that the virus first be rendered non-  
46 infectious [1]. Several effective methods have been devised to inactivate SARS-CoV-2,  
47 but unfortunately many of these techniques destroy the structural and genetic properties  
48 required for effective viral research.

49           In this study, we validated a pair of techniques that can each effectively  
50 neutralize SARS-CoV-2. The two techniques—heat inactivation and ultraviolet (UV)  
51 irradiation—both inactivate SARS-CoV-2 with differing effects on important viral  
52 characteristics [2-4]. We discovered that heat inactivation is ideal for retaining genetic  
53 material while UV irradiation allows for purification of high-quality virions. We establish  
54 conditions for each method that completely inactivate viral infectivity and detail the  
55 detection of viral components that will facilitate a researcher’s particular experimental  
56 needs.

57 **Materials and Methods:**

58 *Virus and Cells* – SARS-CoV-2 strain WA01 was obtained from BEI Resources  
59 (Manassas, VA). E6 Vero cells were obtained from ATCC (Manassas, VA) and grown in  
60 DMEM supplemented with 10% FBS, 1% pen-strep. Viral stocks were propagated and

61   titered on E6 Vero cells in DMEM supplemented with 2% FBS and 1% pen-strep. Viral  
62   stocks were made by collecting media from infected cell cultures showing extensive  
63   cytopathic effect and centrifuged 1,000 RCF for 5 minutes to remove cellular debris.  
64   The clarified viral supernatant was then used for all subsequent inactivation studies. For  
65   determination of viral infectivity by plaque assay, E6 Vero cells were cultured then  
66   incubated with viral inoculum at limiting dilutions. Following inoculation, cells were over-  
67   layered with either 1 or 0.75% methylcellulose, DMEM supplemented with 2% FBS and  
68   1% pen-strep and incubated for 3-4 days [1,5]. Cells were then fixed and stained with  
69   0.5% methylene blue/70% ethanol solution. Plaques were counted and the overall titer  
70   was calculated.

71   *Heat Inactivation* - SARS-CoV2 viral supernatants were aliquoted into 1.5 mL screw cap  
72   tubes and incubated in a 65°C water bath for defined periods of time. Triplicate samples  
73   were generated for each time point tested. The water bath was set to 65°C and  
74   validated with a thermometer. Tubes were placed into the water bath and held for 15,  
75   20, 25, and 30 minutes. At each time interval three tubes were removed from the water  
76   bath and placed onto chilled Armor Beads to quench the inactivation. Samples were  
77   then subjected to limiting dilution and assessed by plaque assay as described above.

78   *UV Inactivation* – To UV inactivate SARS-CoV-2 we employed a UV sterilizing oven  
79   (Fisher Cat No. 13-245-22) placed within a biosafety cabinet. This sterilizer is equipped  
80   with 5 UV bulbs with peak emission around 254 nm (UV-C irradiation). UV exposure of  
81   viral supernatants was conducted in an open top 10 cm Petri dish. Up to 15 mL of viral  
82   supernatant was placed into three separate dishes and put into the sterilizer where the  
83   lids were removed. The maximum depth of material was calculated at 1.5 mm. The

84 dishes were irradiated for the indicated time and the power recorded. At each time point  
85 250  $\mu$ L of viral supernatant was collected from the dish. Samples were then subjected to  
86 limiting dilution as indicated and assessed by plaque assay as described above.

87 *RNA quantification* – The sequences of qPCR amplification primers for the SARS-CoV-  
88 2 RdRp (Orf1ab) gene were: D2-8F\_nCoV\_RdRP forward primer 5'-  
89 GTGARATGGTCATGTGTGGCGG -3', D2-8R\_nCoV\_RdRP reverse primer 5'-  
90 CARATGTTAAASACACTATTAGCATA -3' [6]. The sequence of RdRp gene TaqMan  
91 probe was: D2-8P2\_nCoV\_RdRP 5'-/FAM/ CCAGGTGGWACRTCATCMGGTGATGC  
92 /BHQ1/-3'. The sequences of qPCR amplification primers for the SARS-CoV-2 E gene  
93 were: Forward Primer: D2-7F\_nCoV\_E 5'-ACAGGTACGTTAATAGTTAATAGCGT-3',  
94 Rev Primer: D2-7R\_nCoV\_E 5'-ATATTGCAGCAGTACGCACACA-3' [6]. The sequence  
95 of E gene TaqMan probe was: 5'-/FAM/ AACTAGCCATCCTTACTGCGCTTCG  
96 /BHQ1/-3'. Samples were amplified using SuperScript III Platinum One-Step qRT-PCR  
97 kit (Invitrogen 11732-020) with a final reaction volume of 10  $\mu$ L. Primers and probes  
98 were ordered from Eurofins Operon and were prepared as 100  $\mu$ M stocks. The working  
99 stocks of the primers were 25  $\mu$ M with a final reaction concentration of 800 nM. The  
100 working stock of the probe was 10  $\mu$ M with a final reaction concentration of 200 nM.

101 Each reaction mix contained 0.05  $\mu$ M ROX reference dye, 0.32 U/ $\mu$ L SUPERase RNase  
102 Inhibitor (Invitrogen AM2694), and 1  $\mu$ L of RNA. Thermocycling was performed in a real-  
103 time qPCR machine (QuantStudio 3, Applied Biosystems): 1 cycle for 30 min at 60 °C, 1  
104 cycle for 2 min at 95 °C, and 40 cycles between 15 s at 95 °C and 1 min at 60 °C.

105 *In vitro transcribed RNA*. Standard curves were generated using serial dilutions of *in*  
106 *vitro* transcribed SARS-CoV-2 RdRp (Orf1ab) and E genes. To generate the *in vitro*

107 transcribed RNA, gBlocks were ordered from IDT with a T7 promoter, forward and  
108 reverse primer sites, and probe sequence for the RdRp (Orf1ab) gene and E gene of  
109 SARS-Cov-2 Wuhan-Hu-1 strain. The gBlocks were *in vitro* transcribed using a  
110 MEGAscript T7 RNA Synthesis Kit (Ambion, AM1333) following manufacturers  
111 instruction and purified over a GE Illustra Sephadex G-50 NICK column (Cytiva,  
112 17085501). RNA concentration was quantified using a NanoDrop spectrophotometer to  
113 determine the copy number per  $\mu\text{L}$ .

114 *Sucrose Cushion purification* - Inactivated viral supernatant was overlaid onto a two-  
115 step sucrose density cushion previously used to purify coronavirus particles [7]. The  
116 phosphate buffered sucrose at 17% and 30% were layered on the bottom of  
117 ultracentrifuge tubes. Viral supernatants were then layered on top of the sucrose and  
118 then spun at 87,000 rcf for 2 hours in either a SW28 or SW21 rotor in a Beckman  
119 ultracentrifuge. The resulting supernatant was decanted, and each pellet was  
120 resuspended in up to 300  $\mu\text{L}$  of Phosphate Buffered Saline.

121 *Gel Electrophoresis and Western Blotting* –

122 Protein content was analyzed using SDS-PAGE and Western blot. Briefly, resuspended  
123 virion pellets were mixed with 2x loading buffer, heated to 95°C for 5 minutes then  
124 loaded onto a 10% SDS-PAGE gel. For direct detection of protein bands, gels were  
125 stained with Coomassie Brilliant Blue. For detection of specific proteins, gel separated  
126 proteins were then transferred to PVDF membranes. Membranes were then blocked  
127 with 5% dried milk in PBS- 0.1% Tween followed by incubation with SARS Coronavirus  
128 NP Monoclonal Antibody (E16C) (ThermoFisher Scientific, Catalog # MA1-7403) or  
129 SARS Coronavirus Spike polyclonal Serum (BEI Resources, Manassas, VA). Primary

130 antibody complexes were detected with goat anti-mouse (Invitrogen) or goat anti-rabbit  
131 (Santa Cruz Biotech) HRP conjugated secondary antibodies. Reactive bands were  
132 detected by ECL reagent and exposure to autoradiography film.

### 133 *Electron Microscopy -*

134 Viral samples were negatively stained by placing 5ul of resuspended virion pellets on a  
135 300 mesh formvar coated copper grid and left for 30 seconds. Excess liquid was then  
136 wicked off and 5ul of 2% uranyl acetate was applied. This stain was also wicked off after  
137 30 seconds. The stained grids were viewed with a LEO 912 (Zeiss) transmission  
138 electron microscope operated at 100KV accelerating voltage. Photos were taken with a  
139 2K X 2K Proscan camera.

### 140 *Detection of viral antigens by ELISA*

141 Suspensions of purified virions were coated onto 96-well ELISA plates at 4ug total  
142 protein per ml in PBS (50ul per well) and incubated at 4 degrees C overnight. Excess  
143 protein was decanted and plates washed five times with 0.1% Tween-20 in PBS (wash  
144 buffer). Plates were blocked with 3% nonfat milk in wash buffer for 1 hour. Mid-titer  
145 rabbit polyclonal serum obtained from BEI Resources (Manassas, VA) was 2-fold  
146 serially diluted in 1% nonfat milk in wash buffer, applied to plates, and incubated for 2  
147 hours. Antisera was decanted and plates were washed as above, followed by  
148 incubation for 1 hour at room temperature with a 1:3000 dilution of goat-anti-rabbit  
149 secondary antibody conjugated to HRP in wash buffer with 1% nonfat milk. The extent  
150 of antibody capture was measured by colorimetric detection following treatment with  
151 TMB substrate and acid stop solution and quantified on a Molecular Devices  
152 VERSAMax microplate reader.

153 **Results:**

154 *Inactivation of SARS-CoV-2 by exposure to elevated temperature*

155 The first method of inactivation we employed was the well-established procedure of  
156 incubation at high temperature [2,8]. Viral supernatants were incubated in a water bath  
157 at 65°C for specific intervals of time. The principle of this method is that excessive heat  
158 destabilizes viral proteins and assemblies, rendering them incapable of infection.

159 To test this inactivation method, a time course of heat exposure was conducted  
160 in screw-cap tubes containing 1.4 mL of SARS-CoV-2 viral stocks. The water bath was  
161 pre-heated for one hour with the temperature confirmed by an external thermometer.  
162 The tubes were placed into the water bath and held for 15, 20, 25, or 30 minutes. At  
163 each time point three tubes were removed from the water bath and placed onto chilled  
164 beads to reduce temperature and prevent excessive inactivation. Samples were then  
165 subjected to limiting dilution and assessed by plaque assay, as detailed in Table 1. Our  
166 calculated titer at 0 minutes was  $1.04 \times 10^8$  pfu/mL. Plaque assays performed on  
167 clarified viral supernatant heated at 65°C for 15, 20, 25 and 30 minutes resulted in zero  
168 countable plaques (Table 1). This data demonstrates that a complete loss of viral  
169 infectivity was observed following heat inactivation for all time points tested after T0.

170 *Inactivation of SARS-CoV-2 by exposure to UV-C irradiation*

171 To test the inactivation ability of UV-C, a time course of UV exposure was employed to  
172 determine the minimal amount of UV irradiation required to inactivate SARS-CoV-2  
173 [4,9]. Up to 15 mL of clarified viral supernatant was placed in a 10cm Petri dish without  
174 a lid and exposed to UV-C irradiation for various amounts of time, as described in the  
175 Materials and Methods. UV-C treated virus was then subjected to limiting dilution and



176 assessed by plaque assay. Initial testing looked at the inactivation of SARS-CoV-2  
177 following 15s, 30s, 45s, 1 min, 2 min, 3min, and 4 min of UV-C exposure. The  
178 calculated titer of unexposed viral stocks was  $4.5 \times 10^7$  pfu/mL. We observed no viral  
179 plaques at all UV-C exposure times. We therefore evaluated SARS-CoV-2 inactivation  
180 following 2s, 5s, 10s, and 15s of UV-C exposure. The titer of unexposed stocks was  
181  $1.04 \times 10^8$  pfu/mL. Plaques were detected following 2s and 5s exposure, correlating to  
182  $1.39 \times 10^5$  pfu/mL and 10 pfu/mL, a 3- and 7-log reduction in infectivity, respectively.  
183 Exposures of 10s or greater resulted in no detectable plaques demonstrating a  
184 complete loss of virus infectivity (Table 2, Figure 1).

#### 185 *Calculating sufficient levels of UV-C irradiation*

186 A common method of assessing efficacy of inactivation for UV-C irradiation is to  
187 calculate a sterility assurance level [10]. The SAL is a standard used to estimate the  
188 probability of a single viable pathogen being present in a sample following inactivation.  
189 This standard is often used by manufacturers employing various irradiation-based  
190 inactivation methods to validate that products are safe. Most companies use a SAL of  
191  $10^{-6}$ , which indicates that there is a 1 in 1,000,000 chance of a non-sterile unit surviving  
192 inactivation. For our purposes, calculating the SAL would not only help ensure  
193 inactivation of SARS-CoV-2, but also determine the minimum amount of UV-C  
194 necessary for sample inactivation. Based on intermediate inactivation values we were  
195 able to calculate the dosage of UV-C radiation that reduces infectivity of a sample by  
196 90% or one log<sub>10</sub> (D10 value):

$$197 \quad \text{D10 value} = \frac{\text{UV Exposure Power}}{\text{Log}_{10}(\text{starting titer}) - \text{Log}_{10}(\text{ending titer})}$$

198 The reduction in titer following 2 and 5 seconds of UV-C exposure leads to the  
199 calculated dose needed to inactivate one log of SARS-CoV-2, which is 5,320  $\mu\text{J}/\text{cm}^2$   
200 delivered by the UV sterilizer. Using this D10 value means that to reduce infectious titer  
201 of  $10^8$  pfu/mL stock solution to a SAL of  $10^{-6}$  would require an UV-C dose of  $7.45 \times 10^4$   
202  $\mu\text{J}/\text{cm}^2$ . This is equivalent to 10.4 seconds of exposure in the UV sterilizer under the  
203 conditions we have described. It is critically important to utilize sufficient dosing of  
204 irradiation to provide a greater margin for potential error. We have chosen a minimum  
205 dose of  $1.9 \times 10^5 \mu\text{J}/\text{cm}^2$  as sufficient to inactivate SARS-CoV-2.

#### 206 *Detection of RNA from Inactivated supernatants*

207 Various methods are currently being used to inactivate SARS-CoV-2 samples  
208 prior to diagnostic testing by quantitative Real-time PCR (qRT-PCR) or Loop Mediated  
209 Isothermal Amplification (LAMP) [11]. Given the importance of nucleic acids for these  
210 tests, we sought to determine if either of our methods would differentially impact RNA  
211 detection. We quantified the amount of RNA from both UV and heat inactivated samples  
212 and compared the number of genomes that could be detected to an untreated sample.  
213 RNA from the untreated and inactivated samples was extracted using the QiaAMP Viral  
214 RNA kit and quantified with two different primer sets targeting the RdRp (Orf1ab) or E  
215 gene of SARS-CoV-2. *In vitro* transcribed RdRp or E gene RNA was used to generate  
216 standard curves for genome copy quantification. A serial dilution of each *in vitro*  
217 transcribed RNA was performed to ensure that our different samples fell within the  
218 linear detection limit of our assay. The dilutions of each *in vitro* transcribed RNA ranged  
219 from  $10^8$  to  $10^3$  copies per  $\mu\text{L}$  and was plotted against the Ct value to determine the  
220 efficiency of each reaction. The RdRp gene primer pairs produced a reaction efficiency

221 around 95.22% and all samples fell within the linear range of the assay (Figure 2A). For  
222 the E gene primer pairs the reaction efficiency was determined to be 98.71% and again,  
223 all samples fell within the linear range of the assay (Figure 2B).

224 For the untreated sample, an average of  $2.3 \times 10^8$  genome copies per  $\mu\text{l}$  were  
225 detected by the RdRp primers and  $1.4 \times 10^8$  genome copies per  $\mu\text{l}$  were detected by the  
226 E primers. In contrast, UV inactivated samples treated for 1 minute had a 2 and 3 log  
227 reduction in the amount of RNA detected with an average of  $1.8 \times 10^6$  and  $1.9 \times 10^5$   
228 genome copies per  $\mu\text{l}$  detected by the RdRp and E primers, respectively. The amount of  
229 RNA detected was further reduced as UV exposure times increased to 5 and 10  
230 minutes. UV-C exposure for 10 minutes resulted in detection of an average of  $1.2 \times 10^5$   
231 and only  $3.9 \times 10^3$  genome copies with the RdRp and E primers, respectively. The  
232 genomic location of the RdRp and E genes, along with the increased variability in  
233 detection via qRT-PCR, suggests that degradation of the RNA may be proceeding from  
234 the 3' end of the genome following exposure to UV-C radiation. In contrast, heat  
235 inactivation at T20 and T25 resulted in an average of  $1.2 \times 10^8$  genome copies per  $\mu\text{l}$   
236 and at T30 an average of  $1.6 \times 10^8$  genome copies per  $\mu\text{l}$  with the RdRp primers. The E  
237 primers detected an average of  $2.6 \times 10^7$ ,  $3.6 \times 10^7$ , and  $2.7 \times 10^7$  genome copies per  $\mu\text{l}$   
238 from viral stocks heat inactivated for 20, 25, and 30 minutes, respectively. Compared to  
239 UV treatment, heat inactivation did not disrupt the SARS-CoV-2 genome allowing for  
240 comparable amounts of RNA detected compared to untreated controls. Overall, the E  
241 primers resulted in slightly lower amount of RNA detected, which could be the result of  
242 degradation from the 3' end of the genome and should be considered when designing  
243 qRT-PCR assays for use with heat inactivated samples.

244 *Purification of Virions from Inactivated Supernatant*

245 To remove contaminants from inactivated virions, we employed a two-step  
246 sucrose gradient purification previously described for the porcine epidemic diarrhea  
247 virus (PEDV) [7]. Inactivated viral supernatants were subjected to high-speed  
248 centrifugation through a two-step sucrose gradient to purify and concentrate virions for  
249 downstream applications. Pelleted material was resuspended in PBS resulting in highly  
250 concentrated SARS-CoV-2 virions.

251 Following resuspension, we assessed the purity of viral proteins by SDS-PAGE  
252 prior to visualization by Coomassie or Western blot for viral proteins (Figure 3). Fewer  
253 Coomassie stained bands were observed from UV-C inactivated material than from heat  
254 inactivated material. This could indicate that UV-C treated virions are damaged or  
255 cross-linked together, reducing detection of SARS-CoV-2 virion proteins. More likely,  
256 the heat inactivation results in extensive protein denaturation and aggregation. These  
257 aggregated proteins may non-specifically bind to virions, or co-precipitate in our  
258 purification scheme.

259 The differences in protein yield are also reflected in Western blot analysis of  
260 specific viral proteins. We see the most intense bands of both Spike and Nucleocapsid  
261 protein come from heat inactivated material with no obvious differences between 20 and  
262 30 minutes of heat exposure. UV-C irradiation results in reduced quantities of both the  
263 aforementioned viral proteins. More importantly, excessive UV-C exposure at 5- and 10-  
264 minutes results in a clear increase in a slower migrating species of Spike protein. This  
265 slowly migrating species is likely the result of cross-linking between the proteolytically  
266 cleaved portions of the Spike. Additionally, we observed that greater UV exposure

267 produced a minor, but detectable, amount of slower migrating N-protein that was not  
268 detected at 1 minute of UV exposure.

### 269 **Electron Microscopy analysis of inactivated virions**

270 To better understand the state of the virion following inactivation and purification,  
271 we subjected the resuspended, semi-purified virion pellets to examination under an  
272 electron microscope (Figure 4). In all conditions, spherical structures with protuberances  
273 that match descriptions of SARS-CoV-2 virions were readily detectable [12]. UV  
274 inactivated virions revealed the most intact viral particles, with the virions subjected to  
275 the lowest UV exposure appearing the most “normal”. Heat inactivated material, while  
276 mostly comparable in appearance, exhibited deformed and disrupted virion structures  
277 that increased in prevalence at longer inactivation times.

### 278 **Detection of inactivated and purified virions by ELISA**

279 Retaining the antigenicity of inactivated virus is an important consideration when  
280 developing diagnostic assays or vaccines. To this end, we assessed the serological  
281 detectability of our inactivated viruses using an indirect ELISA. Wells were coated with  
282 equivalent amounts of viral protein prior to being exposed to a dilution series of SARS-  
283 CoV-2-specific poly-clonal rabbit serum. Negative control rabbit serum was used to  
284 measure the background binding capacity of the different preparations. As depicted in  
285 Figure 5, all purified virion preparations had marginal background signal from the  
286 negative control serum. We observed that detection of virion components was  
287 influenced by the type and extent of inactivation. Optimal detection was observed for  
288 samples receiving 1- or 5- minutes of UV-C irradiation, with no signal detected from the  
289 10-minute sample. Heat inactivated material was also detected, but at a lower rate than

290 that of UV-C inactivated samples. Together, this suggests that short duration UV  
291 exposure produces the higher quality of virions compared to heat inactivation.

292 **Discussion:**

293 Viral inactivation is a powerful tool for mitigating research risk while expediting scientific  
294 objectives. The most useful methods of inactivation are effective and reliable without  
295 being overly destructive to virion components. The goal of this study was to validate two  
296 methods of SARS-CoV-2 inactivation—heat inactivation and UV-C irradiation—and  
297 assess their respective effects on virion components. We observed that both techniques  
298 were wholly effective at inactivating virus with minimal effects on virion morphology and  
299 antibody mediated detection.

300 An important initial aspect of this study was to determine the appropriate levels of viral  
301 inactivation by both methods. Insufficient inactivation puts researchers at risk for  
302 exposure, while excessive inactivation can compromise important virion components  
303 and limit research applicability. In this study, we observed that excessive UV-C  
304 irradiation reduced SARS-CoV-2 detection by ELISA, likely due to significant cross-  
305 linking of viral proteins observed by Western Blot. Many studies published on the  
306 inactivation of beta-coronaviruses use significantly higher levels of UV-C irradiation than  
307 what we report here [4,9,13]. Our methods significantly reduced UV-C exposure by  
308 optimizing experimental conditions. Working in a biosafety cabinet, we removed the  
309 plastic lids from the 10cm dishes that would have otherwise absorbed much of the  
310 incoming UV-C radiation. Because UV-C is attenuated as a function of depth, we also  
311 enhanced the surface area of exposure while limiting the fluid depth to less than 2mm,  
312 ensuring equal inactivation of the sample throughout and limiting overexposure. In a

313 similar vein, heat inactivation was performed in small volume tubes (1.5 mL) in a water  
314 bath to ensure the even heating and inactivation of samples throughout.

315 It is clear that while both methods effectively inactivated SARS-CoV-2, each had  
316 unique effects on the virus that in turn affected downstream applications. Heat treatment  
317 is a common method of viral inactivation that works via the denaturation of viral proteins  
318 and disassembly of virion structures. It was interesting to see that heat inactivation,  
319 even at excessive times, left virions mostly intact, an encouraging observation for  
320 protocols that enrich virions based on the biophysical properties of intact structures. We  
321 also observed that while heat treatment eliminated infectivity, viral genomes were left  
322 largely intact. This made heat inactivation the preferred method for evaluations using  
323 genome-based assays like PCR. Unlike heat inactivation, UV-C irradiation works  
324 primarily by damaging SARS-CoV-2 RNA, preventing the transcription and replication of  
325 viral genomes. We observed this method to be especially effective at retaining virion  
326 morphology and antigenicity. Visualization of inactivated virions by electron microscopy  
327 showed that UV-C irradiated samples retained much of their native viral structure.  
328 These samples were also significantly more detectable by ELISA compared to samples  
329 that were heat inactivated. Both UV-C irradiated, and heat inactivated samples yielded  
330 near equivalent amounts of protein, though quality of viral proteins varied when  
331 assessed by Western blot. This is important to note if considering downstream  
332 applications for antigen detection or vaccine development.

333 The results of our study indicate that both heat inactivation and UV-C irradiation are  
334 viable methods for inactivating SARS-CoV-2 for use in BSL-2 laboratory environments.  
335 Both methods left the virion mostly intact while effects on other viral properties differed.

336 From this study it is clear that both the extent and method of inactivation have important  
337 ramifications on SARS-CoV-2 virions that should be considered when planning  
338 experiments or downstream applications.

339

340 Acknowledgements-

341 The following reagents were obtained through BEI Resources, NIAID, NIH: 2019 Novel  
342 Coronavirus, strain 2019-nCoV/USA-WA1/2020, NR-52281 and Rabbit Sera Control  
343 Panels, Polyclonal Anti-SARS-CoV Spike Protein, NR-4569. Sequences for primer  
344 development were kindly provided by Dr. Dr. Jon Shultz at NIH Rocky Mountain Labs,  
345 Hamilton, MT. This work would not have been possible without the support of MSU's  
346 Office of Research Compliance and the JRL management team of Kirk Lubick, Ryan  
347 Bartlett and Kathryn Jutila. Funding for this research was provided by the Vice President  
348 of Research and Economic Development COVID Research Fund.

349

350



351 Table 1 – Heat Inactivation

|               | <i>Dilution plated</i> | <i>Plaques counted (each replicate)</i> | <i>Calculated titer (pfu/mL)</i> |
|---------------|------------------------|-----------------------------------------|----------------------------------|
| <i>0 min</i>  | 10 <sup>-5</sup>       | 215                                     | 1.04 x10 <sup>8</sup>            |
|               | 10 <sup>-6</sup>       | 13                                      |                                  |
| <i>15 min</i> | undiluted              | 0,0,0                                   | 0                                |
| <i>20 min</i> | undiluted              | 0,0,0                                   | 0                                |
| <i>25 min</i> | undiluted              | 0,0,0                                   | 0                                |
| <i>30 min</i> | undiluted              | 0,0,0                                   | 0                                |

352 Table 2 – UV inactivation

|                  | <i>Cumulative UV dose <math>\mu</math>J/cm<sup>2</sup></i> | <i>Dilution plated</i> | <i>Plaques counted (each replicate)</i> | <i>Average Calculated titer</i> |
|------------------|------------------------------------------------------------|------------------------|-----------------------------------------|---------------------------------|
| <i>0 seconds</i> |                                                            | 10 <sup>-5</sup>       | 215                                     | 1.04 x10 <sup>8</sup>           |
|                  |                                                            | 10 <sup>-6</sup>       | 14                                      |                                 |
| <i>2 s</i>       | 1.82 x10 <sup>4</sup>                                      | 10 <sup>-2</sup>       | TMTC <sup>1</sup> , 14, TMTC            | 1.39 x10 <sup>5</sup>           |
| <i>5 s</i>       | 3.61 x10 <sup>4</sup>                                      | 10 <sup>-3</sup>       | 23, 0, 57                               |                                 |
| <i>10 s</i>      | 6.69 x10 <sup>4</sup>                                      | undiluted              | 6, 0, 0                                 | 10                              |
| <i>15 sec</i>    | 9.78 x10 <sup>4</sup>                                      | undiluted              | 0, 0, 0                                 | 0                               |
|                  |                                                            | undiluted              | 0, 0, 0                                 | 0                               |

353 <sup>1</sup> TMTC = Too many to count

354

355

356 **References:**

- 357 1. Jureka, A. S.; Silvas, J. A.; Basler, C. F. Propagation, Inactivation, and Safety Testing  
358 of SARS-CoV-2. *Viruses* **2020**, *12*.
- 359 2. B, P.; F, T.; M, G.; de Lamballerie X; RN, C. Heat Inactivation of Different Types of  
360 SARS-CoV-2 Samples: What Protocols for Biosafety, Molecular Detection and  
361 Serological Diagnostics? *Viruses* **2020**, *12*, 735.
- 362 3. JP, A.; BD, P.; L, C. Using heat to kill SARS-CoV-2. *Rev Med Virol* **2020**, *177*, 71.
- 363 4. CS, H.; UW, A.; L, S.; U, D.; O, W.; D, Y.; X, Z.; K, S.; M, T.; M, A.; E, S.; A, K.  
364 Susceptibility of SARS-CoV-2 to UV Irradiation. *American journal of infection control*  
365 **2020**.
- 366 5. HOTCHIN, J. E. Use of Methyl Cellulose Gel as a Substitute for Agar in Tissue-  
367 Culture Overlays. *Nature* **1955**, *175*, 352–352.
- 368 6. Corman, V. M.; Landt, O.; Kaiser, M.; bulletin, R. M. E. S.; 2019 *Detection of novel*  
369 *coronavirus (2019-nCoV) by real-time RT-PCR*.
- 370 7. Hofmann, M.; Wyler, R. Enzyme-linked immunosorbent assay for the detection of  
371 porcine epidemic diarrhea coronavirus antibodies in swine sera. *Veterinary Microbiology*  
372 **1990**, *21*, 263–273.
- 373 8. Wu, Z.-G.; Zheng, H.-Y.; Gu, J.; Li, F.; Lv, R.-L.; Deng, Y.-Y.; Xu, W.-Z.; Tong, Y.-Q.  
374 Effects of Different Temperature and Time Durations of Virus Inactivation on Results of  
375 Real-time Fluorescence PCR Testing of COVID-19 Viruses. *CURR MED SCI* **2020**, *9*,  
376 19.

- 377 9. Darnell, M. E. R.; Subbarao, K.; Feinstone, S. M.; Taylor, D. R. Inactivation of the  
378 coronavirus that induces severe acute respiratory syndrome, SARS-CoV. *Journal of*  
379 *Virological Methods* **2004**, *121*, 85–91.
- 380 10. Thomas von Woedtke, A. K. The limits of sterility assurance. *GMS*  
381 *Krankenhaushygiene Interdisziplinär* **2008**, *3*, 789–793.
- 382 11. Y, W.; W, S.; Z, Z.; P, C.; J, L.; C, L. The impacts of viral inactivating methods on  
383 quantitative RT-PCR for COVID-19. *Virus Research* **2020**, *285*, 197988.
- 384 12. Neuman, B. W.; Adair, B. D.; Yoshioka, C.; Quispe, J. D.; Orca, G.; Kuhn, P.;  
385 Milligan, R. A.; Yeager, M.; Buchmeier, M. J. Supramolecular Architecture of Severe  
386 Acute Respiratory Syndrome Coronavirus Revealed by Electron Cryomicroscopy. *J.*  
387 *Viol.* **2006**, *80*, 7918–7928.
- 388 13. Tsunetsugu-Yokota, Y. Large-Scale Preparation of UV-Inactivated SARS  
389 Coronavirus Virions for Vaccine Antigen. In *SARS- and Other Coronaviruses*;  
390 Laboratory Protocols; Humana Press, Totowa, NJ: Totowa, NJ, 2008; Vol. 454, pp.  
391 119–126.
- 392
- 393

394 **Figure Legends**

395 *Figure 1 – Plaque analysis and UV inactivation*

396 A) Infectious viral particles were detected by plaque assay under methylcellulose.  
397 Depicted is a single well of a six-well plate that had been inoculated with a limiting  
398 dilution of infectious viral stock. The inset is a higher magnification image of  
399 representative SARS-CoV-2 plaques. B) A clarified solution containing infectious SARS-  
400 CoV-2 was subjected to UV exposure as detailed in Materials and Methods. Samples  
401 were taken from triplicate conditions at sequential exposures to UV-C irradiation. Each  
402 sample was then assessed for infectivity by the previously described plaque assay.

403

404 *Figure 2 – Detection of RNA genomes following inactivation*

405 Inactivated viral supernatants were subjected to RNA extraction and detection. A and B)  
406 A standard curve was produced for the RdRp (A) and E (B) assays using serial diluted  
407 *in vitro* transcribed RNA (brown circles). RNA from UV and heat inactivated samples  
408 (light blue and dark blue, respectively) fall within the linear detection of both assays. The  
409 untreated genomic RNA is represented by the pink circle. C) Quantification of the  
410 untreated RNA, UV inactivated samples at 1, 5 and 10 minutes and heat inactivated  
411 samples at 20, 25 and 30 minutes are shown. The mean and SEM from triplicate wells  
412 for the RdRp (tan) and E (grey) assays are shown.

413

414 *Figure 3 – Comparison of virion protein quality following inactivation*

415 Viral supernatants inactivated by UV or Heat exposure were loaded onto a two-step  
416 sucrose gradient and subjected to ultracentrifugation. The resulting pellets were

417 resuspended in PBS and analyzed for protein content. A) 5  $\mu$ g of resuspended pellets  
418 from the two inactivation conditions were loaded onto a 10% SDS-PAGE gel that was  
419 then subjected to Coomassie staining. B) 0.2  $\mu$ g of each pellet was run on a 10% gel  
420 and transferred to PVDF membrane for Western analysis for SARS-CoV-2 Spike or  
421 Nucleocapsid. Protein extracted from SARS-CoV-2 infected cells was run as a positive  
422 control.

423 *Figure 4 – Electron microscopy analysis of virion morphology*

424 Semi-purified virion preparations were spotted onto a grid and imaged to assess virion  
425 morphology. The top row of images was taken from UV inactivated samples. The  
426 bottom row of images was taken from heat inactivated samples. Relative size is  
427 indicated by the scale bar in the lower corner of each image.

428

429 *Figure 5 – Indirect ELISA detection of virions*

430 Semi-purified virions from both UV and Heat inactivated methods were used as coating  
431 antigen in an indirect ELISA assay. Poly-clonal serum from negative control or SARS-  
432 CoV-2 Spike immunized rabbits was used as the primary antibody with anti-rabbit-HRP  
433 and colorimetric detection was used to measure the extent of antibody capture. Plotted  
434 is the resulting O.D. measurements from a representative set of dilutions.

435

**A**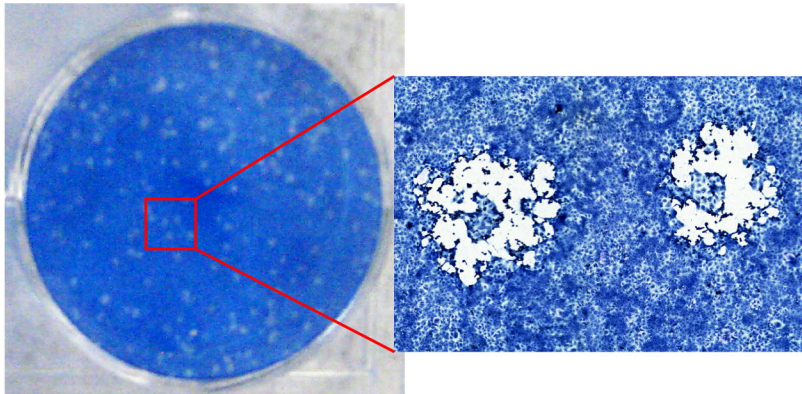**B**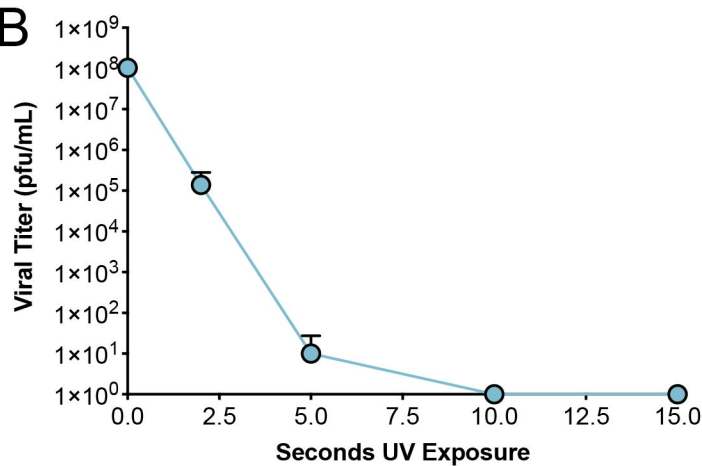

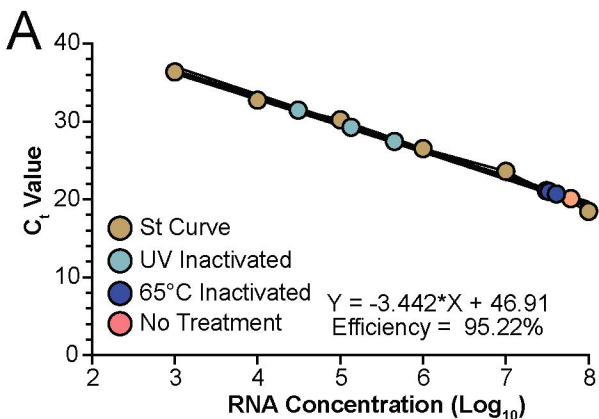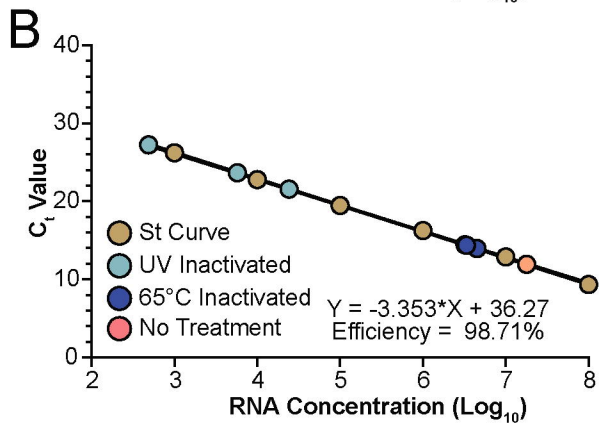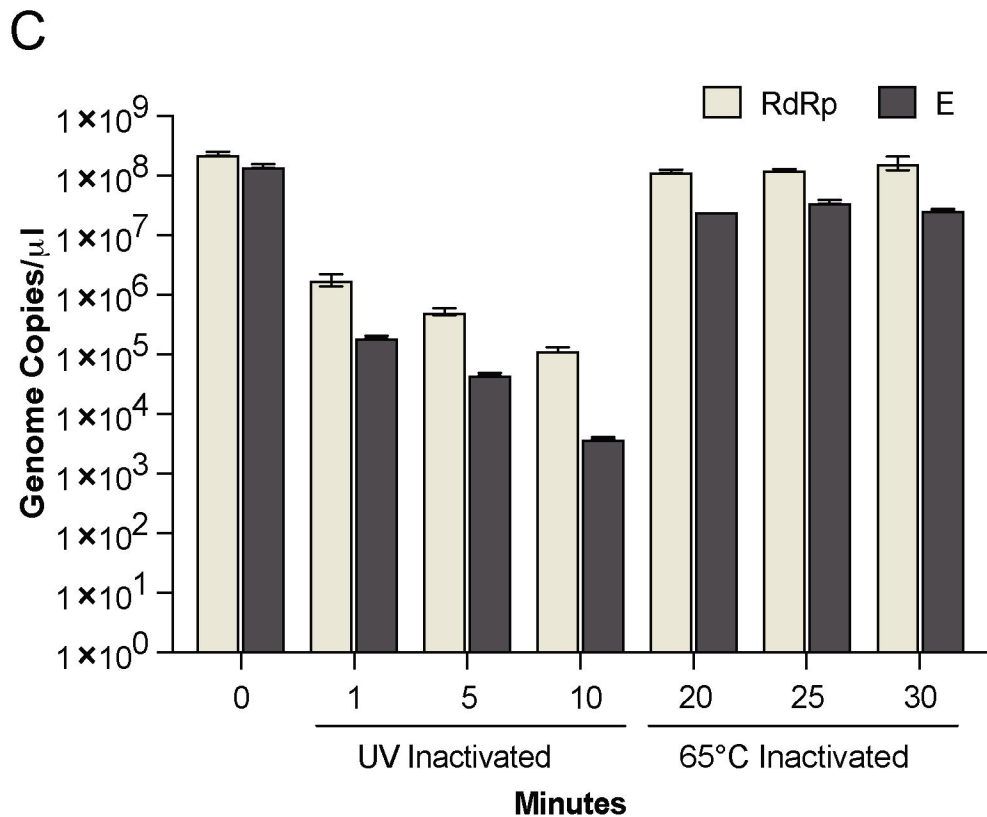

**A**

UV Inactivated

1 5 10 min.

65°C  
Inactivated

20 30 min.

250 kDa  
150  
100  
75  
50  
35  
25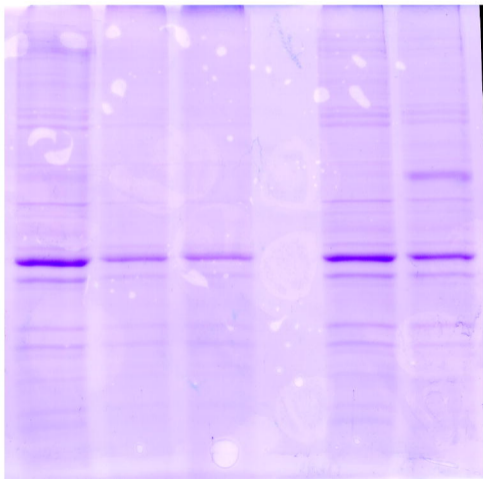**B**

UV Inactivated

1 5 10 min.

65°C  
Inactivated

20 30 min.

250 kDa  
150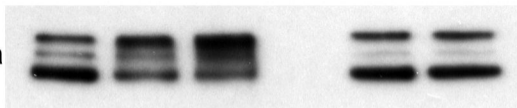

anti-Spike

250 kDa

100  
75  
50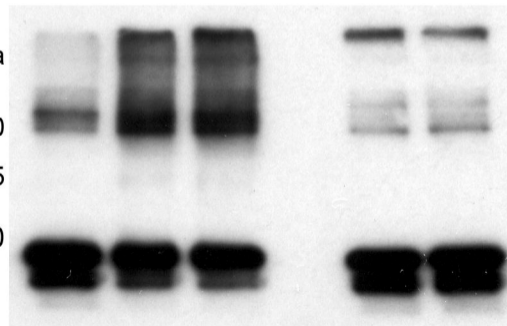anti-  
Nucleocapsid



UV Inactivated

1 min.

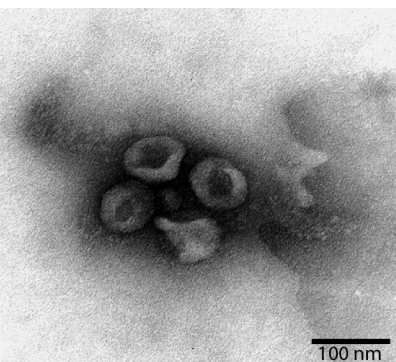

5 min.

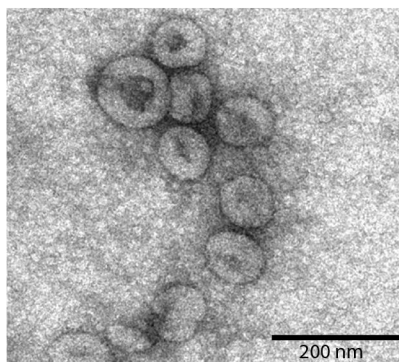

10 min.

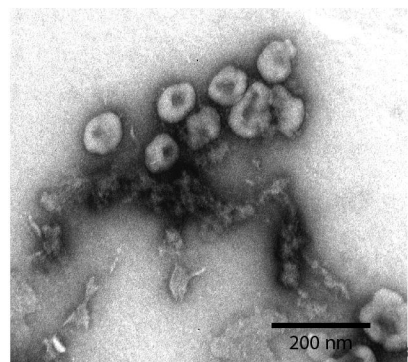

65°C Inactivated

20 min.

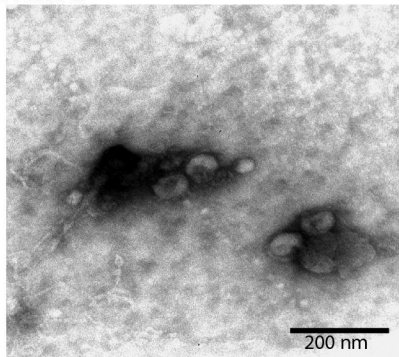

30 min.

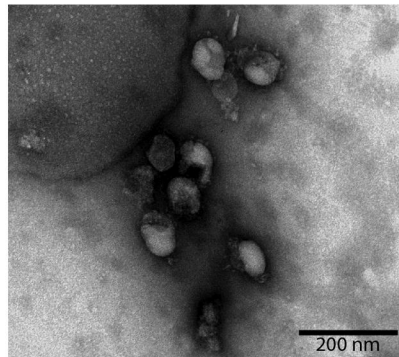

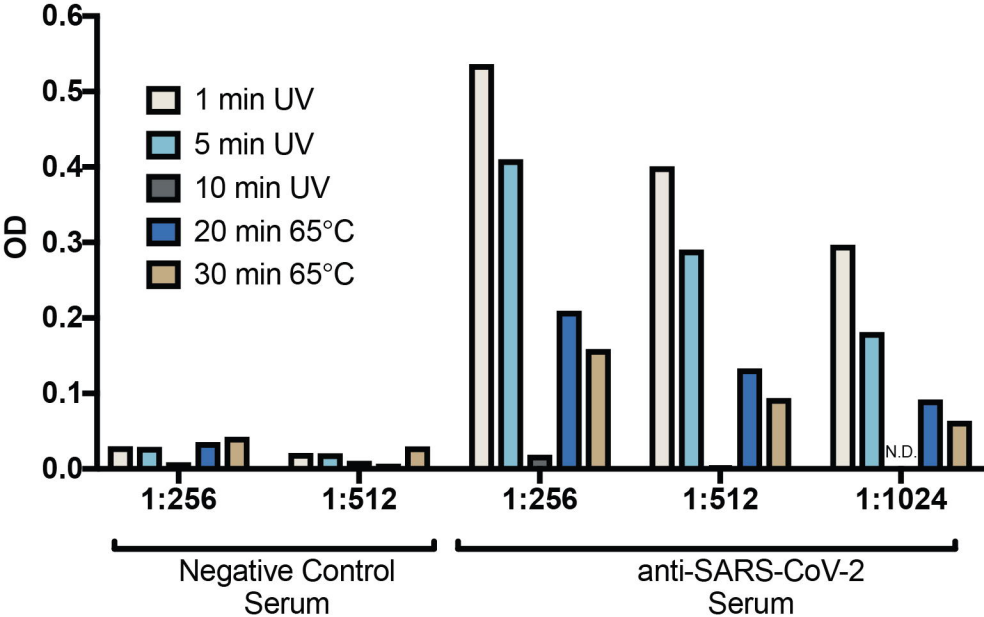

Source: https://www.biorxiv.org/content/10.1101/2020.11.14.383026v1.full.pdf
